# Supplementary material for: Electrochemical Synthesis of Reduced Graphene Oxide/Gold Nanoparticles in a Single Step for Carbaryl Detection in Water
Source: MDPI journal article supplement (doi:10.3390/s22145251), 2022-07-13
Supplement: s1 [file s1]

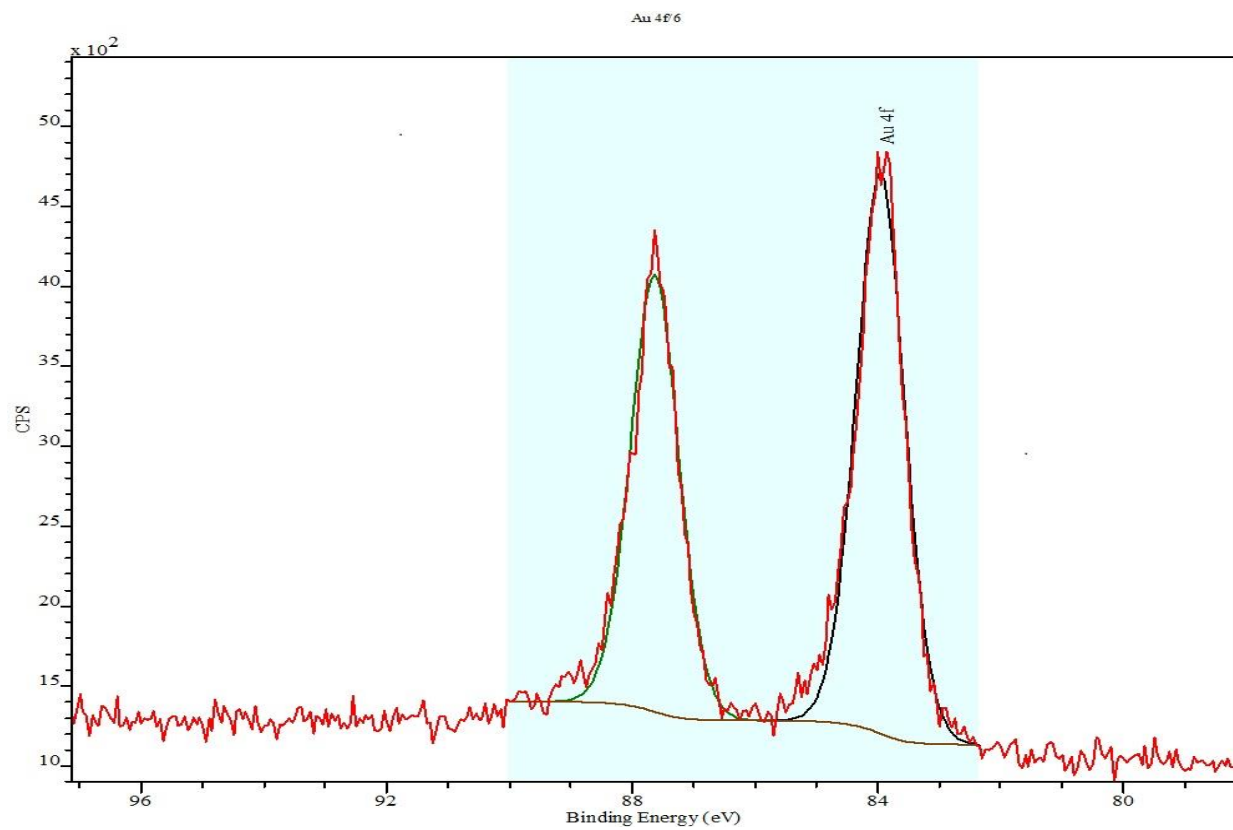

(a)

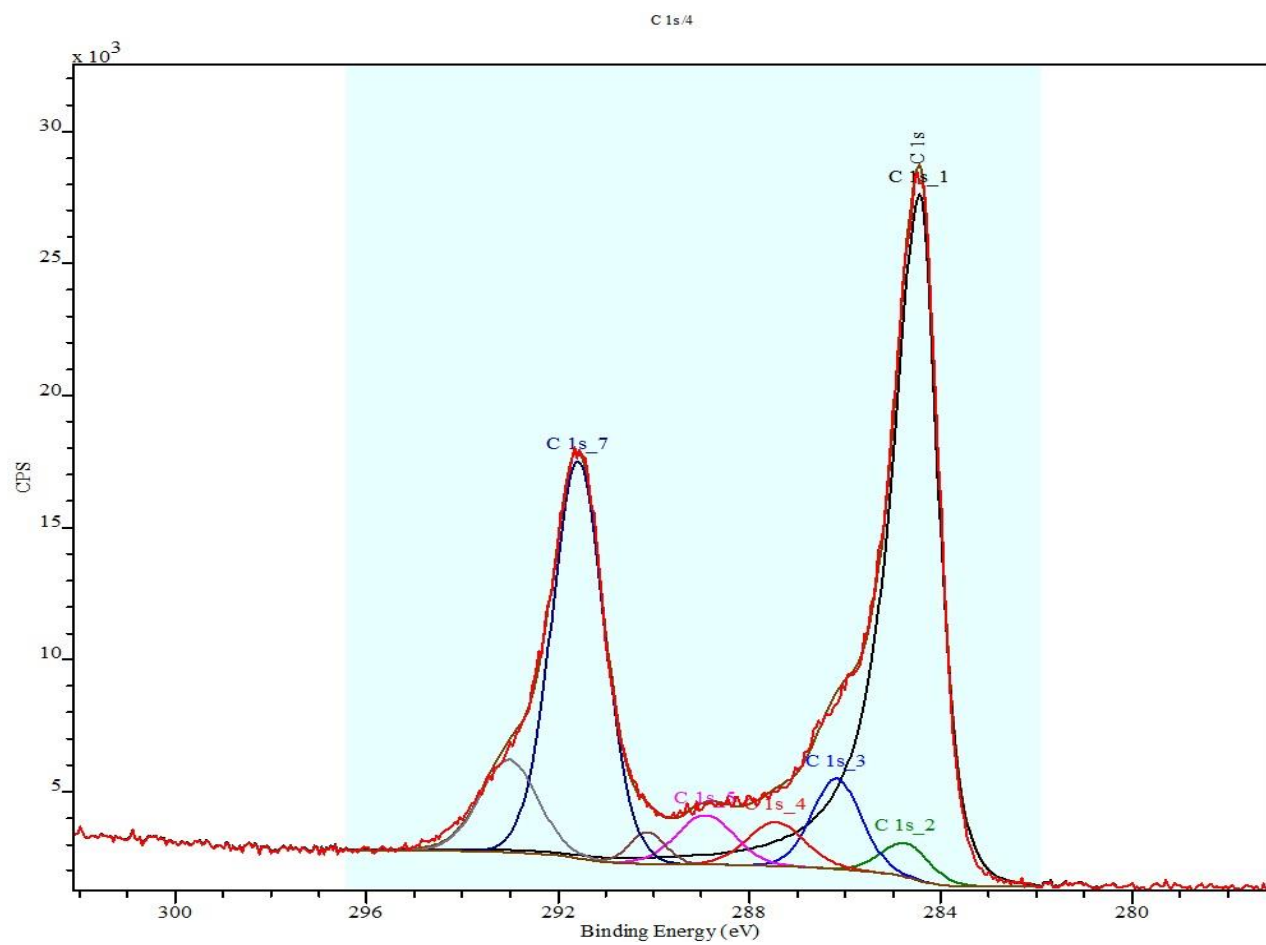

(b)

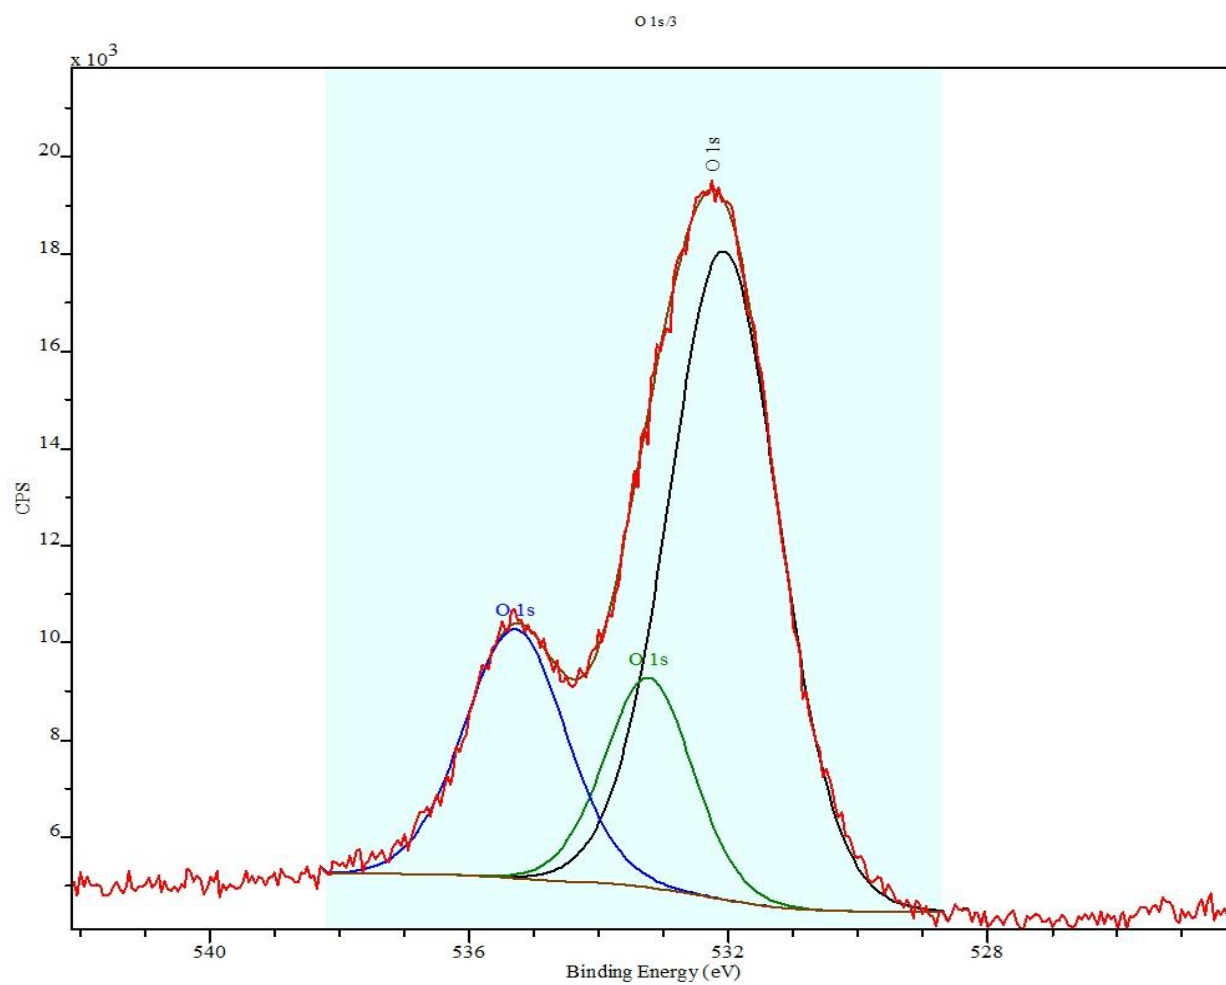

(c)

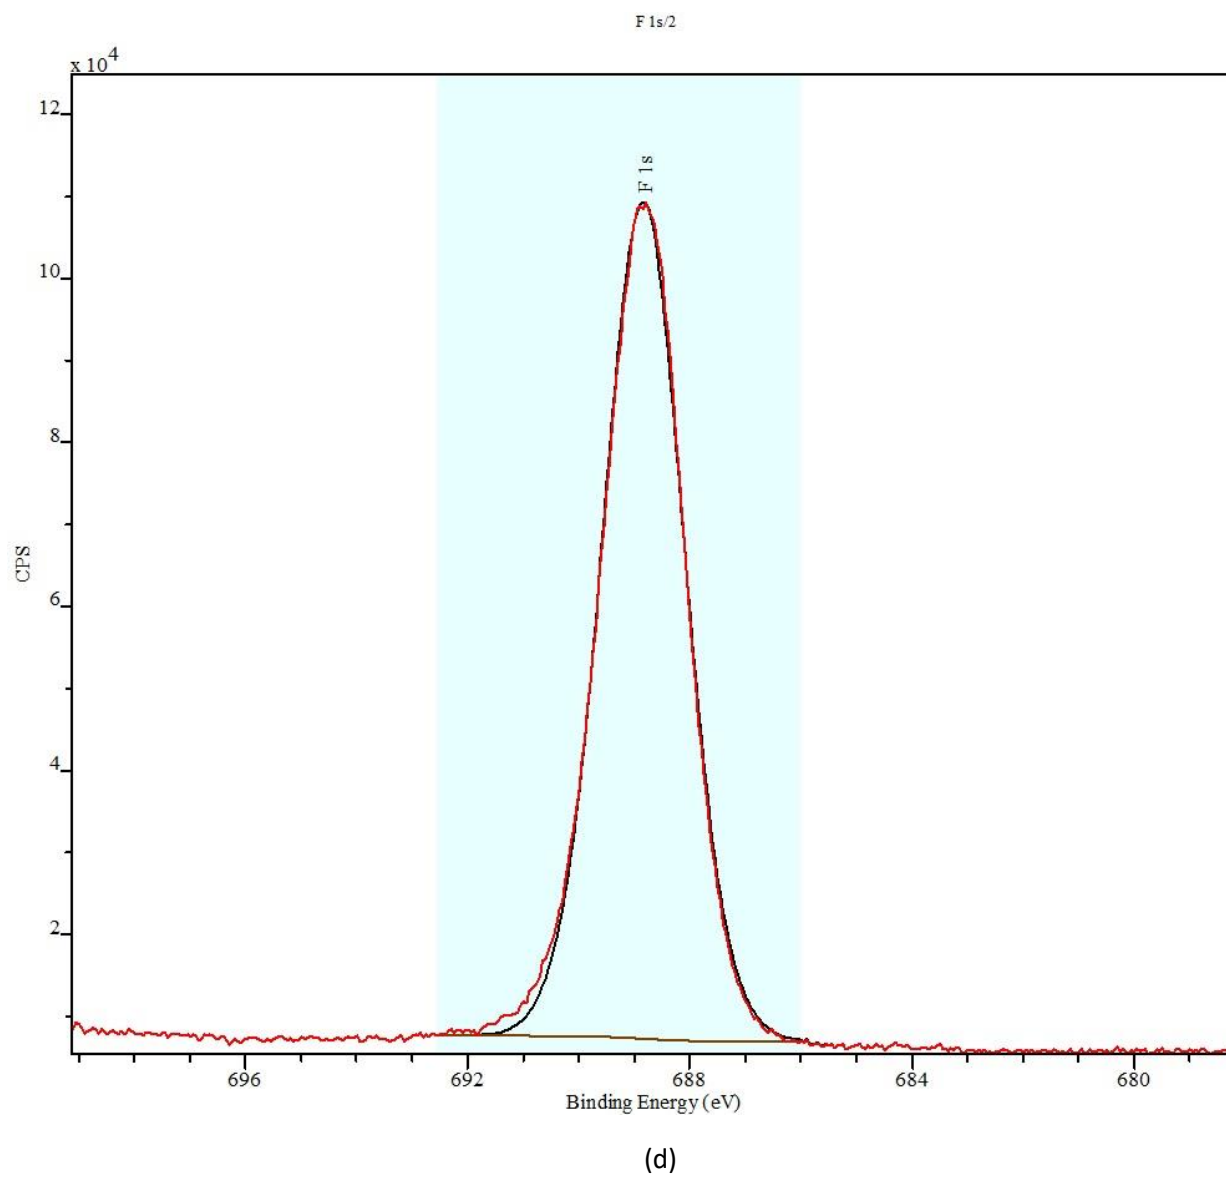

**Figure S1.** XPS Analysis of rGO/AuNP/NA SPCE ; the signal of Au (a), C (b) , O (c) and F (d). Area is approximately  $1 \text{ mm}^2$ .

| Name    | Position | FWHM | R.S.F. | Area   | % Conc. |                     |
|---------|----------|------|--------|--------|---------|---------------------|
| F 1s    | 688.8    | 1.7  | 4.43   | 214232 | 34.9    |                     |
| O 1s    | 532.3    | 2.4  | 2.93   | 48507  | 11.9    |                     |
| C 1s    | 284.5    | 1.2  | 1      | 71247  | 51.3    |                     |
| Au 4f   | 184.5    | 0.9  | 2.1    | 65564  | 41.2    |                     |
| F 1s    | 688.8    | 1.7  | 4.43   | 212225 | 34.9    | C-F                 |
| O 1s_1  | 532.1    | 2.0  | 2.93   | 29912  | 7.4     | O from organics ,   |
| O 1s_2  | 533.2    | 1.6  | 2.93   | 7702   | 1.9     | C-O                 |
| O 1s_3  | 535.3    | 1.8  | 2.93   | 10564  | 2.6     |                     |
| C 1s_1  | 284.5    | 0.9  | 1      | 35891  | 25.7    | C=C                 |
| C 1s_2  | 284.8    | 1.2  | 1      | 1495   | 1.1     | C-C                 |
| C 1s_3  | 286.2    | 1.2  | 1      | 4101   | 2.9     | C-O                 |
| C 1s_4  | 287.4    | 1.4  | 1      | 2350   | 1.7     | C=O                 |
| C 1s_5  | 288.9    | 1.4  | 1      | 2632   | 1.9     | O-C=O               |
| C 1s_6  | 290.1    | 0.9  | 1      | 1022   | 0.7     | pi to pi* satellite |
| C 1s_7  | 291.6    | 1.3  | 1      | 19320  | 13.8    | CF2                 |
| C 1s_8  | 293.0    | 1.4  | 1      | 4917   | 3.5     | CF3                 |
| Au 4f_1 | 84.0     | 0.9  | 17.1   | 2998   | 0.13    | 4f7/2: Au(0)        |
| Au 4f   | 87.6     | 0.9  | 17.1   | 2341   | 0.10    | 4f5/2               |

**Table S1.** Quantification from high resolution spectra for rGO/AuNP/NA SPCE surface.

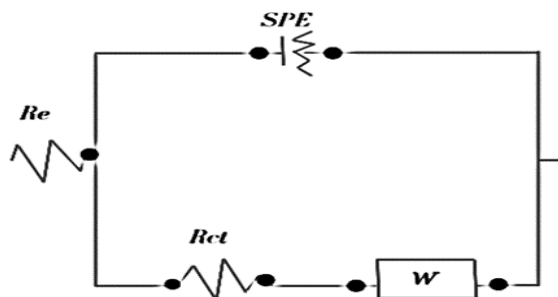

**Impedance parameters and fitted circuit:**

Init E (V) = 0.2 for activated SPCE,

Init E (V) = 0.35 for rGO/NA

Init E (V) = 0.4 for rGO/AuNPs/NA

High Frequency (Hz) = 1e+6

Low Frequency (Hz) = 0.1

Amplitude (V) = 0.1

Quiet Time (sec) = 5

Cycles (.1-1Hz) = 1

**Figure S2.** The equivalent circuit of impedance spectra and EIS parameters.

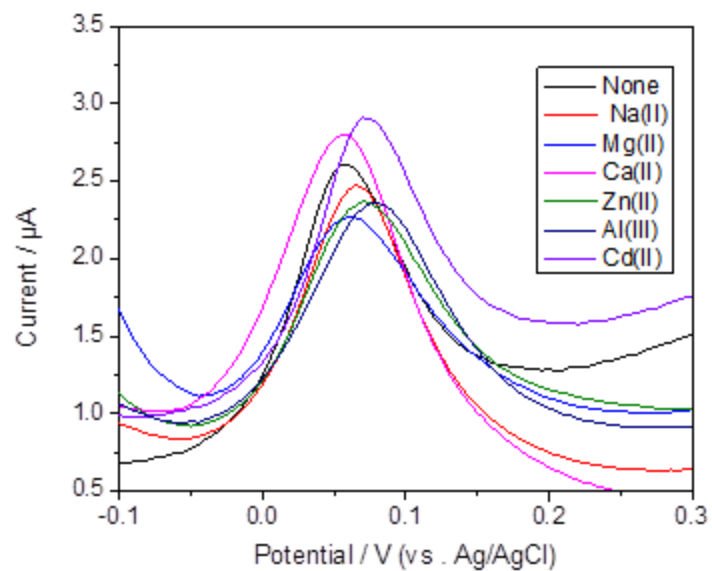

**Figure S3.** DPV of 200  $\mu\text{M}$  carbaryl -phenol in 0.1 M acetate buffer (pH=5) in the presence of 100-fold  $\text{Ca}^{2+}$ ,  $\text{Mg}^{2+}$ ,  $\text{Na}^+$ ,  $\text{Zn}^{2+}$ ,  $\text{Cd}^{2+}$ , and  $\text{Al}^{3+}$  using rGO/AuNP/NA SPCE .
